# Supplementary material for: The Cancer Stem Cell Inhibitor Napabucasin (BBI608) Shows General Cytotoxicity in Biliary Tract Cancer Cells and Reduces Cancer Stem Cell Characteristics
Source: MDPI journal article supplement (doi:10.3390/cancers11030276), 2019-02-26
Supplement: s1 [file s1]

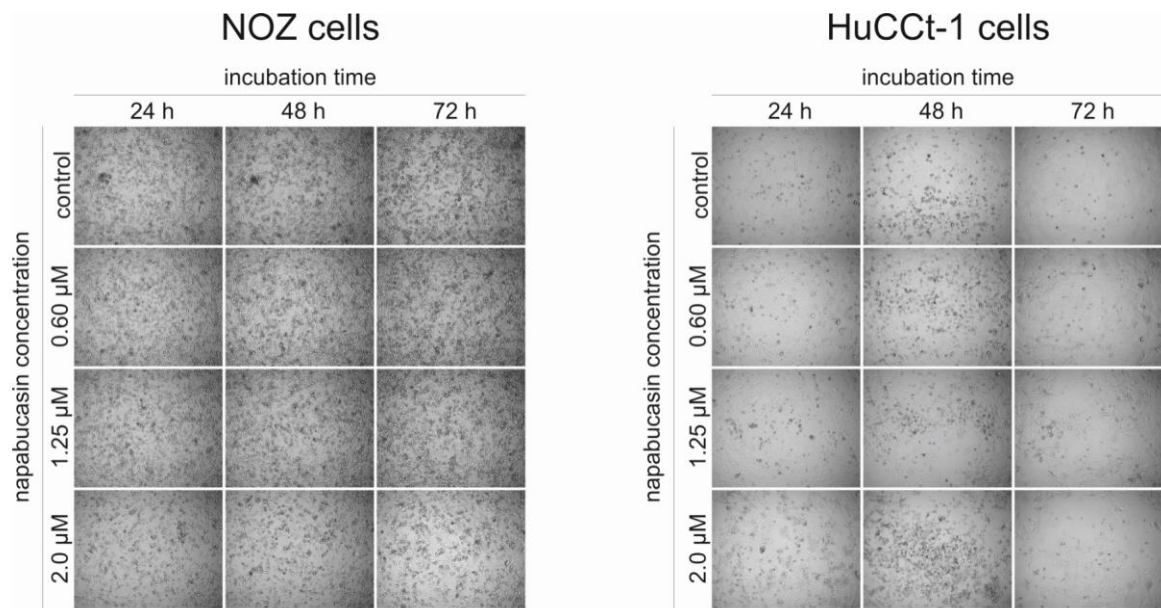

**Figure S1.** Representative images of time-resolved cytotoxic effect of napabucasin in biliary tract cancer cell lines
